# Supplementary material
Source: MDPI journal article supplement (https://www.mdpi.com/2227-9717/9/8/1443)
Supplement: s1 [file s1]

# Anammox-Based Processes for Mature Leachate Treatment in SBR: A Modelling Study

Anna Lanzetta<sup>1</sup>, Davide Mattioli<sup>2</sup>, Francesco Di Capua<sup>3,1</sup>, Gianpaolo Sabia<sup>2</sup>, Luigi Petta<sup>2</sup>, Giovanni Esposito<sup>1</sup>, Gianni Andreottola<sup>4</sup>, Giovanni Gatti<sup>5</sup>, Willy Merz<sup>6</sup> and Michela Langone <sup>7,\*</sup>

- <sup>1</sup> Department of Civil, Architectural and Environmental Engineering, University of Naples Federico II, via Claudio 21, 80125 Naples, Italy; anna.lanzetta@unina.it (A.L.); gioespos@unina.it (G.E.)
  - <sup>2</sup> Laboratory Technologies for the Efficient Use and Management of Water and Wastewater, Italian National Agency for New Technologies, Energy and Sustainable Economic Development (ENEA), Via M.M. Sole 4, 40129, Bologna, Italy; davide.mattioli@enea.it (D.M.); gianpaolo.sabia@enea.it (G.S.); luigi.petta@enea.it (L.P.)
  - <sup>3</sup> Department of Civil, Environmental, Land, Building Engineering and Chemistry, Polytechnic University of Bari, Via E. Orabona 4, 70125, Bari, Italy; francesco.dicapua@poliba.it (F.D.C.)
  - <sup>4</sup> Department of Civil, Environmental and Mechanical Engineering, University of Trento, 38123 Trento, Italy; gianni.andreottola@unitn.it (G.A.)
  - <sup>5</sup> ADEP, Agenzia per la Depurazione (Wastewater Treatment Agency) - Serv. Gestione degli impianti, Autonomous Province of Trento, via Gilli 3, 38121 Trento, Italy; giovanni.gatti@provincia.tn.it (G.G.)
  - <sup>6</sup> APOP, Ag. Prov.le Per le Opere Pubbliche (Provincial Agency for Public Works) - Serv. Opere Ambientali, willy.merz@provincia.tn.it (W.M.)
  - <sup>7</sup> Laboratory Technologies for the Efficient Use and Management of Water and Wastewater, Italian National Agency for New Technologies, Energy and Sustainable Economic Development (ENEA), Via Anguillarese, 301 - 00123, Roma, Italy; michela.langone@enea.it (M.L.)
- \* Correspondence: michela.langone@enea.it

**Citation:** Lanzetta, A.; Mattioli, D.; Di Capua, F.; Sabia, G.; Petta, L.; Esposito, G.; Andreottola, G.; Gatti, G.; Merz, W.; Langone, M. Anammox-Based Processes for Mature Leachate Treatment in SBR: A Modelling Study. *Processes* **2021**, *9*, 1443. <https://doi.org/10.3390/pr9081443>

Academic Editors: Albert Magrí and Tommaso Lotti

Received: 17 June 2021

Accepted: 16 August 2021

Published: 19 August 2021

**Publisher's Note:** MDPI stays neutral with regard to jurisdictional claims in published maps and institutional affiliations.

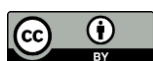

**Copyright:** © 2021 by the authors. Licensee MDPI, Basel, Switzerland. This article is an open access article distributed under the terms and conditions of the Creative Commons Attribution (CC BY) license (<http://creativecommons.org/licenses/by/4.0/>).

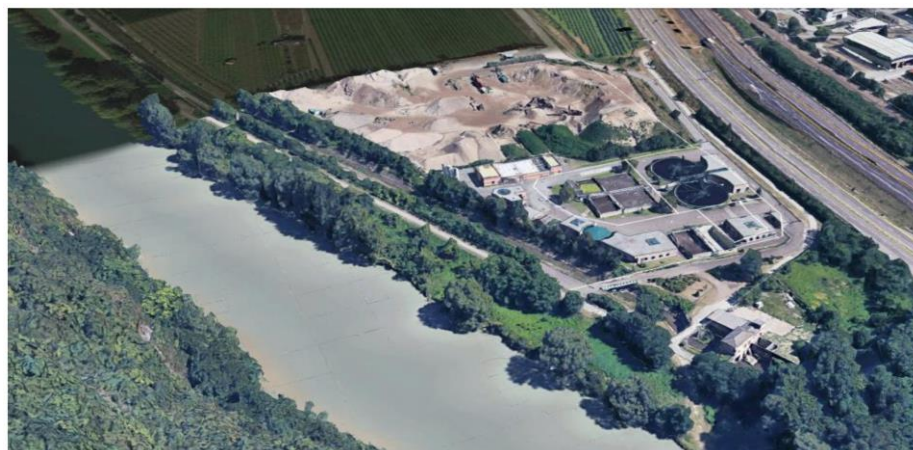

**Figure S1.** Aerial photo of leachate treatment plant of Lavis, Trento

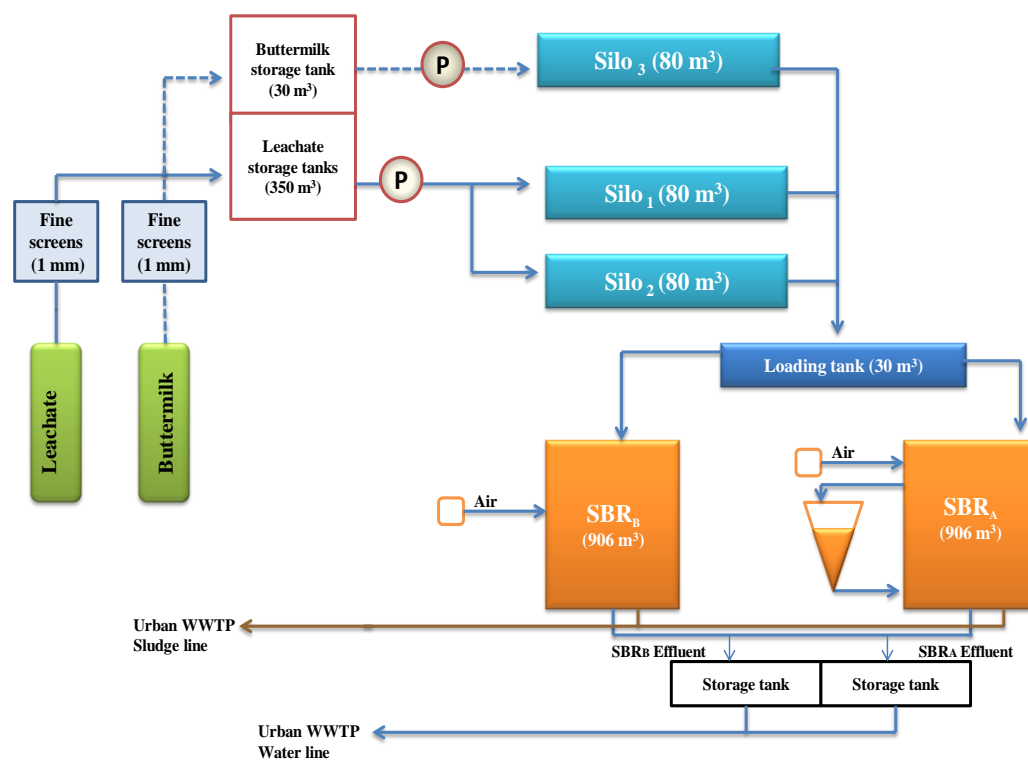

Figure S2. Schematic diagram of the full-scale leachate treatment plant.

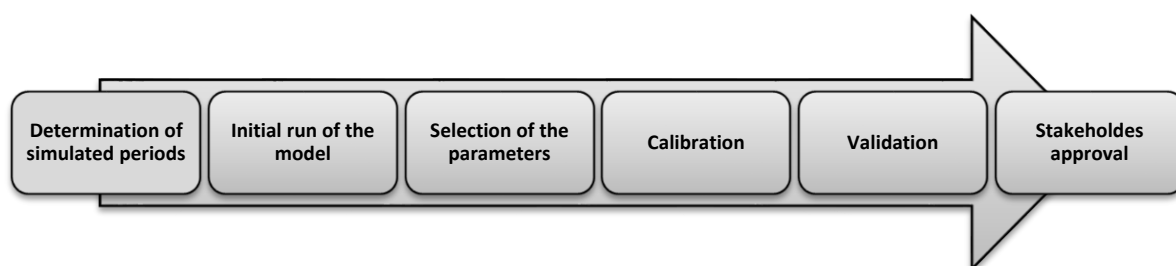

Figure S3. Line map for model calibration and validation processes.

**Table S1.** Variation range of calibrated parameters.

| Parameters                                            | Units                             | Variation range |
|-------------------------------------------------------|-----------------------------------|-----------------|
| Max. spec. growth rate. <sub>AOB</sub>                | d <sup>-1</sup>                   | 0.8-1.1         |
| Substrate (NH <sub>4</sub> ) half sat. <sub>AOB</sub> | mg N L <sup>-1</sup>              | 0.7-26.6        |
| Aerobic decay rate. <sub>AOB</sub>                    | d <sup>-1</sup>                   | 0.035-0.17      |
| Anoxic decay rate. <sub>AOB</sub>                     | d <sup>-1</sup>                   | 0.035-0.08      |
| Aerobic decay rate. <sub>NOB</sub>                    | d <sup>-1</sup>                   | 0.07-0.17       |
| Anoxic/anaerobic decay rate. <sub>NOB</sub>           | d <sup>-1</sup>                   | 0.07-0.08       |
| Aerobic decay rate. <sub>AAO</sub>                    | d <sup>-1</sup>                   | 0.0019-0.0095   |
| DO half sat. <sub>AOB</sub>                           | mg O <sub>2</sub> L <sup>-1</sup> | 0.125-0.25      |
| DO half sat. <sub>NOB</sub>                           | mg O <sub>2</sub> L <sup>-1</sup> | 0.25-0.50       |

**Table S2.** Reproducibility of sCOD values at the end of SBRs cycles in track studies.

|                  |                 | sCOD measured<br>mg sCOD L <sup>-1</sup> | sCOD simulated<br>mg sCOD L <sup>-1</sup> | Percentage<br>change<br>% |
|------------------|-----------------|------------------------------------------|-------------------------------------------|---------------------------|
| SBR <sub>A</sub> | I Track study   | 548                                      | 512                                       | -1%                       |
|                  | II Track study  | 451                                      | 494                                       | 8%                        |
|                  | III Track study | 423                                      | 595                                       | -18%                      |
|                  | <i>Average</i>  | 474                                      | 534                                       | -4%                       |
| SBR <sub>B</sub> | I Track study   | 526                                      | 521                                       | -7%                       |
|                  | II Track study  | 427                                      | 464                                       | 9%                        |
|                  | III Track study | 567                                      | 482                                       | 29%                       |
|                  | <i>Average</i>  | 507                                      | 4899                                      | 11%                       |

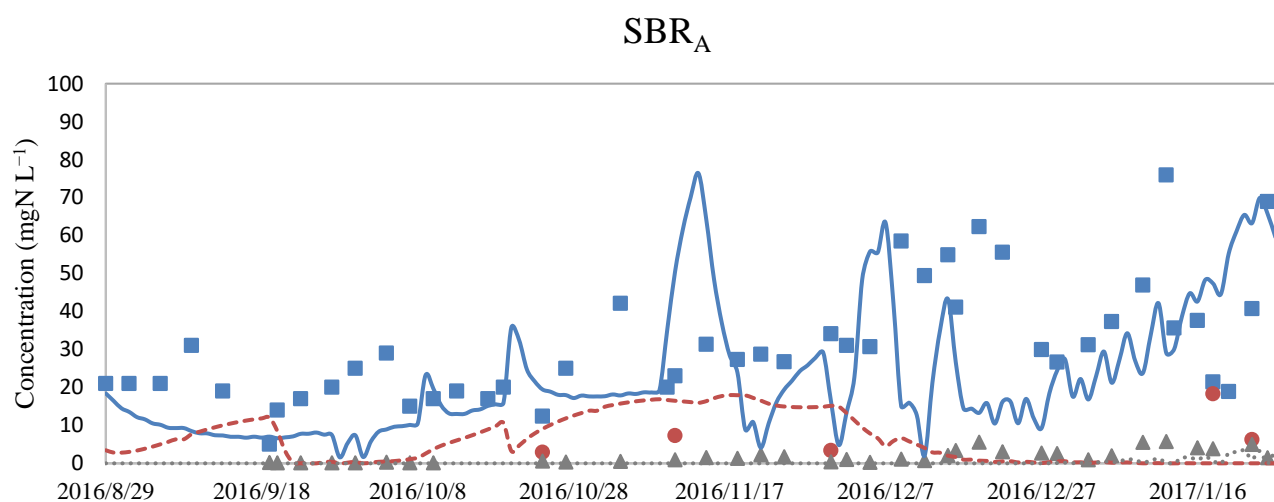

a)

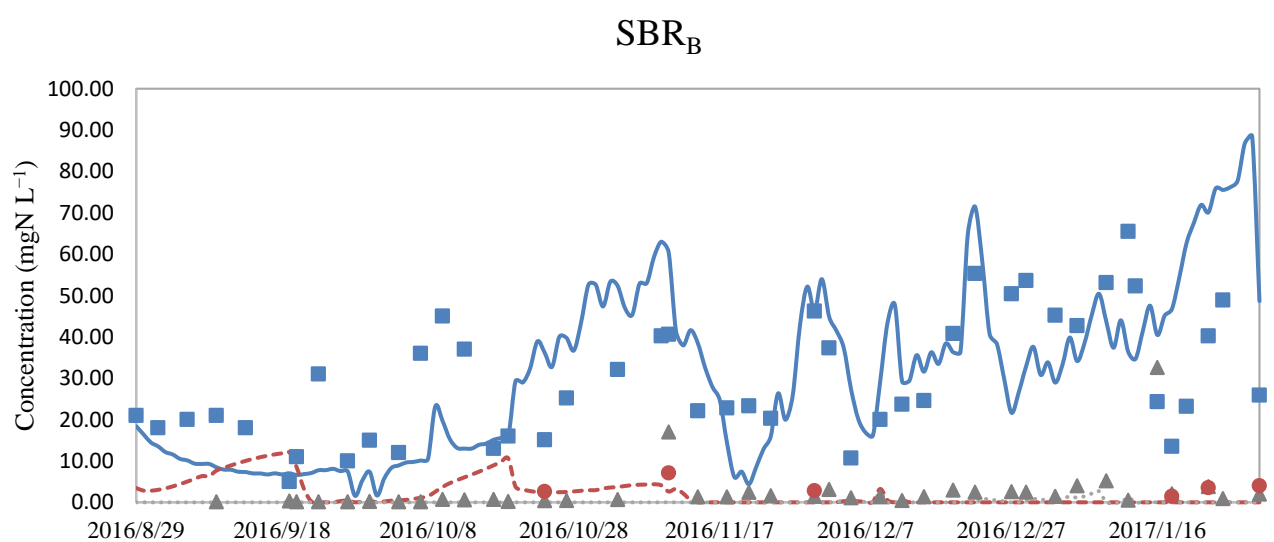

b)

**Figure S4.** . Comparison of measured (■ TAN, ▲ TNN, ●  $\text{NO}_3^-$ -N) and simulated (— TAN, - - - TNN, .....  $\text{NO}_3^-$ -N ) nitrogen effluent concentrations during the monitoring periods for  $SBR_A$  (a) and  $SBR_B$  (b).
